# Supplementary material for: Piperonal chalcone derivative incorporating the pyrazolo[3,4-b]pyridine moiety; crystal structure, spectroscopic characterization and quantum chemical investigations
Source: Royal Society of Chemistry journal article supplement (doi:10.1039/d2ra08101f), 2023-01-01
Supplement: d2ra08101f1.pdf [file d2ra08101f1.pdf]

**Crystal structure, spectroscopic characterization, NLO properties and Hirshfeld surface analysis of a piperonal chalcone derivative incorporating the pyrazolo[3,4-*b*]pyridine moiety**

**Efraín Polo-Cuadrado<sup>1</sup>, Karoll Ferrer<sup>2\*</sup>, Edison Osorio<sup>3</sup>, Iván Brito<sup>4</sup>, Jonathan Cisterna<sup>5</sup>, Luis Espinoza<sup>6</sup>, Joel B. Alderete<sup>7\*</sup>, Margarita Gutiérrez<sup>1\*</sup>**

1. Laboratorio Síntesis Orgánica y Actividad Biológica (LSO-Act-Bio), Instituto de Química de Recursos Naturales, Universidad de Talca, Casilla 747, Talca 3460000, Chile
2. Laboratory of Growth Regulators, Institute of Experimental Botany, The Czech Academy of Sciences, Palacký University, Šlechtitelů 27, 78371 Olomouc, Czech Republic
3. Facultad de Ciencias Naturales y Matemáticas, Universidad de Ibagué, Carrera 22 Calle 67, Ibagué 730001, Colombia
4. Departamento de Química, Facultad de Ciencias Básicas, Universidad de Antofagasta, Avda. Universidad de Antofagasta, Campus Coloso, Antofagasta 02800, Chile
5. Departamento de Química, Facultad de Ciencias, Universidad Católica del Norte, Sede Casa Central, Av. Angamos 0610, Antofagasta, Chile
6. Departamento de Química, Universidad Técnica Federico Santa María, Av. España No. 1680, Valparaíso 2340000, Chile
7. Instituto de Química de Recursos Naturales (IQRN), Universidad de Talca, Avenida Lircay S/N, Casilla 747, Talca, Chile

Corresponding author at:

E-mail address: [karoll.ferrerpertuz@upol.cz](mailto:karoll.ferrerpertuz@upol.cz)

[joel.alderete@utalca.cl](mailto:joel.alderete@utalca.cl)

[mgutierrez@utalca.cl](mailto:mgutierrez@utalca.cl)

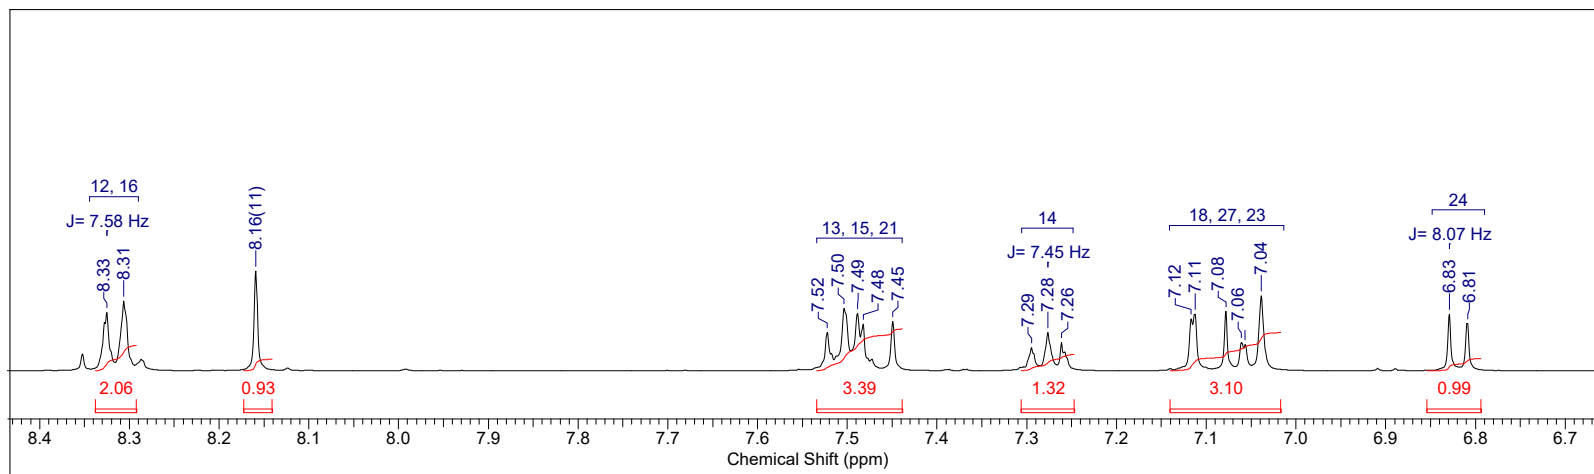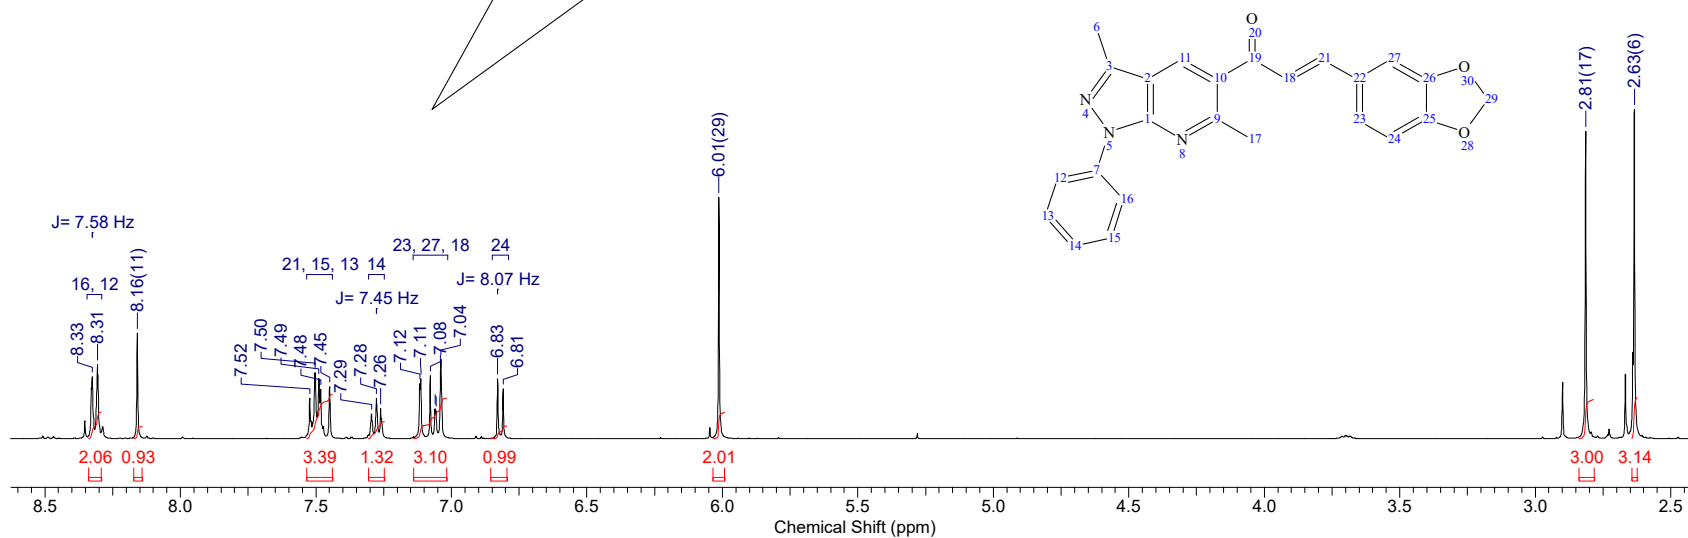

Figure SI-1. <sup>1</sup>H-NMR spectrum of (*E*)-3-(benzo[*d*][1,3]dioxol-5-yl)-1-(3,6-dimethyl-1-phenyl-1*H*-pyrazolo[3,4-*b*]pyridin-5-yl)prop-2-en-1-one (**6**) in CDCl<sub>3</sub>.

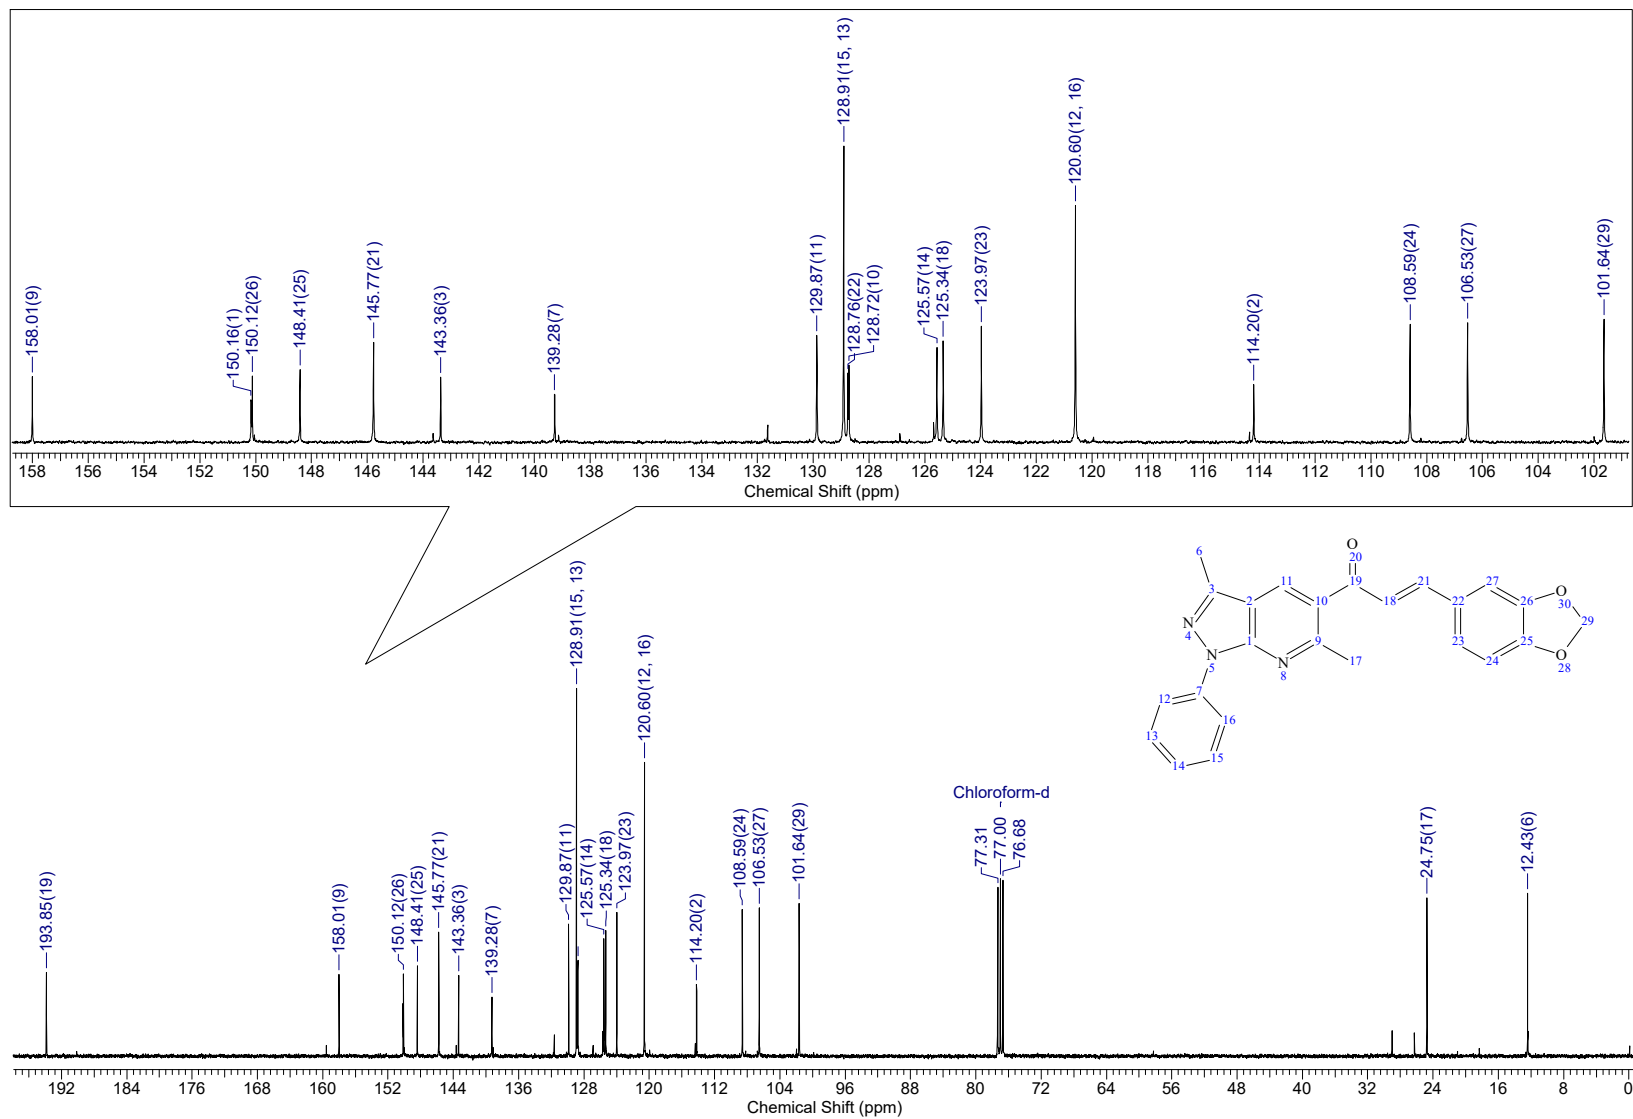

Figure SI-2.  $^{13}\text{C}$ -NMR spectrum of (*E*)-3-(benzo[*d*][1,3]dioxol-5-yl)-1-(3,6-dimethyl-1-phenyl-1*H*-pyrazolo[3,4-*b*]pyridin-5-yl)prop-2-en-1-one (**6**) in  $\text{CDCl}_3$ .

**Table SI-1.** NMR data of (*E*)-3-(benzo[*d*][1,3]dioxol-5-yl)-1-(3,6-dimethyl-1-phenyl-1*H*-pyrazolo[3,4-*b*]pyridin-5-yl)prop-2-en-1-one (**6**) in CDCl<sub>3</sub>.

| Position | $\delta_C$ (ppm)          | $\delta_H$ (ppm)            |
|----------|---------------------------|-----------------------------|
| 1        | 150.16 (C)                | -                           |
| 2        | 114.20 (C)                | -                           |
| 3        | 143.36 (C)                | -                           |
| 6        | 12.43 (CH <sub>3</sub> )  | 2.63 (s)                    |
| 7        | 139.28 (C)                | -                           |
| 9        | 158.01 (C)                | -                           |
| 10       | 128.72 (C)                | -                           |
| 11       | 129.87 (CH)               | 8.16 (s)                    |
| 12       | 120.60 (CH)               | 8.32 (d, <i>J</i> = 7.6 Hz) |
| 13       | 128.91 (CH)               | 7.52-7.45 (m)               |
| 14       | 125.57 (CH)               | 7.28 (t, <i>J</i> = 7.5 Hz) |
| 15       | 128.91 (CH)               | 7.52-7.45 (m)               |
| 16       | 120.60 (CH)               | 8.32 (d, <i>J</i> = 7.6 Hz) |
| 17       | 24.75 (CH <sub>3</sub> )  | 2.81 (s)                    |
| 18       | 125.34 (CH)               | 7.12-7.04 (m)               |
| 19       | 193.85 (C=O)              | -                           |
| 21       | 145.77 (CH)               | 7.52-7.45 (m)               |
| 22       | 128.76 (C)                | -                           |
| 23       | 123.97 (CH)               | 7.12-7.04 (m)               |
| 24       | 108.59 (CH)               | 6.82 (d, <i>J</i> = 8.0 Hz) |
| 25       | 148.41 (C)                | -                           |
| 26       | 150.12 (C)                | -                           |
| 27       | 106.53 (CH)               | 7.12-7.04 (m)               |
| 29       | 101.64 (CH <sub>2</sub> ) | 6.01 (s)                    |

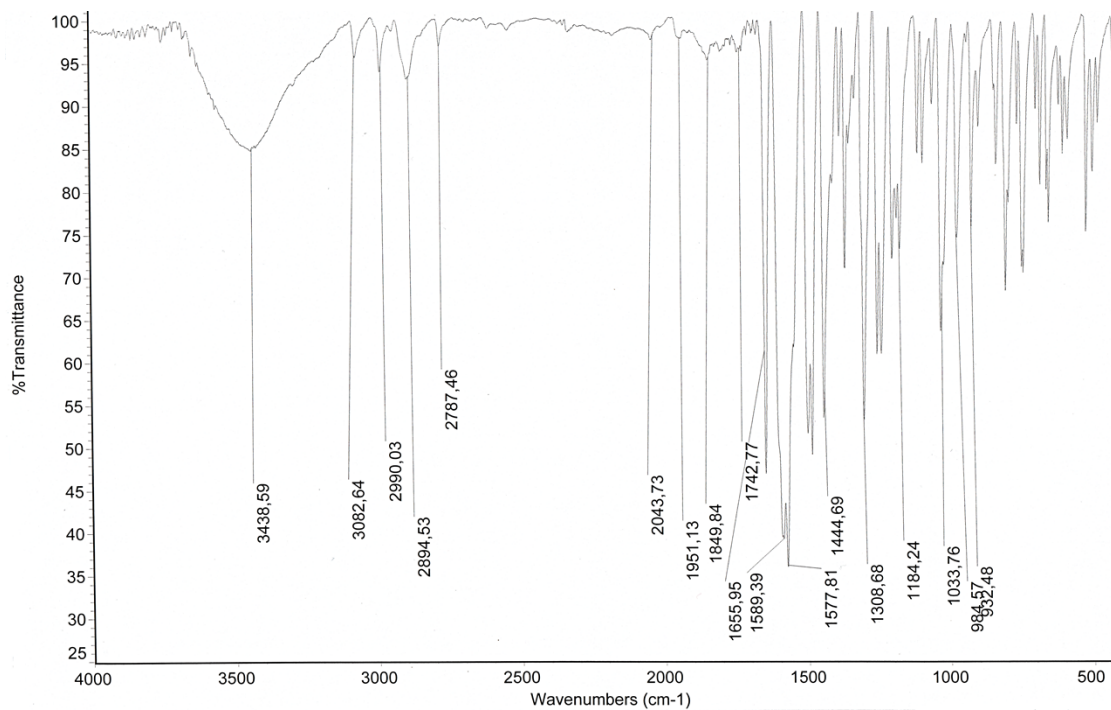

**Figure SI-3.** IR spectrum of (*E*)-3-(benzo[*d*][1,3]dioxol-5-yl)-1-(3,6-dimethyl-1-phenyl-1*H*-pyrazolo[3,4-*b*]pyridin-5-yl)prop-2-en-1-one (**6**).

**Table SI-2.** IR frequencies of (*E*)-3-(benzo[*d*][1,3]dioxol-5-yl)-1-(3,6-dimethyl-1-phenyl-1*H*-pyrazolo[3,4-*b*]pyridin-5-yl)prop-2-en-1-one (6).

| Wavenumber (cm <sup>-1</sup> ) | Intensity <sup>†</sup> | Assignment               |
|--------------------------------|------------------------|--------------------------|
| 3082                           | w                      | =C-H stretch             |
| 2990 and 2894                  | w                      | -C-H stretch             |
| 1655                           | s                      | C=O stretch              |
| 1589                           | s                      | C=N stretch              |
| 1577                           | s                      | C=C stretch              |
| 1444                           | s                      | -C-H bend                |
| 1308                           | s                      | C-O stretch              |
| 1033                           | m                      | C-O stretch              |
| 984                            | m                      | =C-H bend (in-plane)     |
| 754                            | m                      | =C-H bend (out-of-plane) |

<sup>†</sup> Length of the peak (in the y-axis direction), s= strong, m= medium, w= weak.

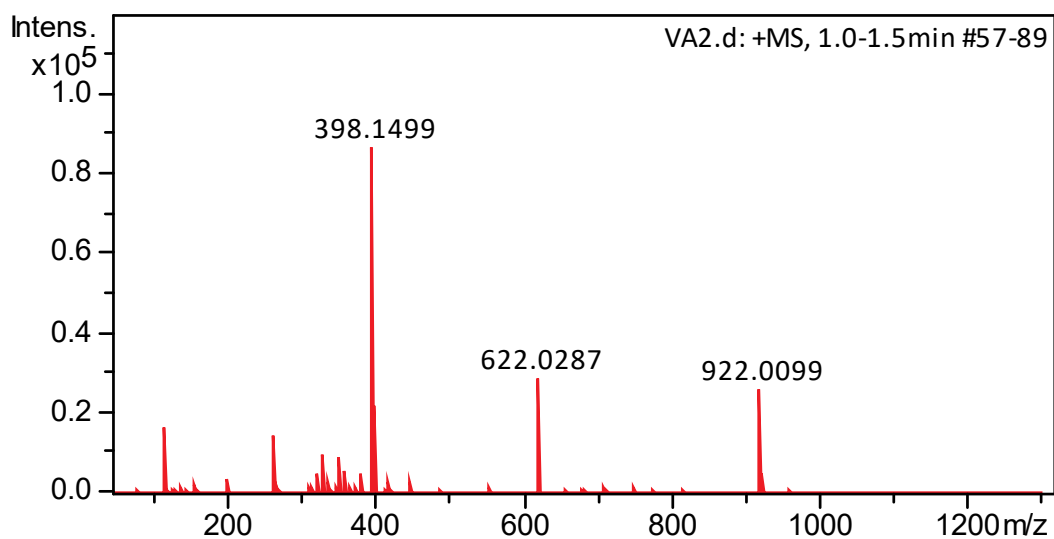

**Figure SI-4.** MS spectrum of (*E*)-3-(benzo[*d*][1,3]dioxol-5-yl)-1-(3,6-dimethyl-1-phenyl-1*H*-pyrazolo[3,4-*b*]pyridin-5-yl)prop-2-en-1-one (6).

**Table SI-3.** Calculated and experimental <sup>1</sup>H chemical shift (ppm) values of compound 6.

| Atom | M062X        |       |             | TPSS  |             | B3LYP |             |
|------|--------------|-------|-------------|-------|-------------|-------|-------------|
|      | Experimental | Cal   | Δx          | Cal   | Δx          | Cal   | Δx          |
| H6A  | 2.63         | 3.02  | 0,39        | 2.80  | 0,17        | 2.81  | 0,18        |
| H6B  | 2.63         | 2.90  | 0,27        | 2.80  | 0,17        | 2.78  | 0,15        |
| H6C  | 2.63         | 2.94  | 0,31        | 2.81  | 0,18        | 2.80  | 0,17        |
| H11  | 8.16         | 9.55  | 1,39        | 8.49  | 0,33        | 8.68  | 0,52        |
| H12  | 8.32         | 9.39  | 1,07        | 8.75  | 0,43        | 8.83  | 0,51        |
| H13  | 7.49         | 8.56  | 1,07        | 7.74  | 0,25        | 7.80  | 0,31        |
| H14  | 7.28         | 7.97  | 0,69        | 7.43  | 0,15        | 7.48  | 0,2         |
| H15  | 7.49         | 8.51  | 1,02        | 7.69  | 0,2         | 7.76  | 0,27        |
| H16  | 8.32         | 10.68 | 2,36        | 10.10 | 1,78        | 10.22 | 1,9         |
| H17A | 2.81         | 3.40  | 0,59        | 2.67  | 0,14        | 2.70  | 0,11        |
| H17B | 2.81         | 3.01  | 0,2         | 2.91  | 0,1         | 2.89  | 0,08        |
| H17C | 2.81         | 3.85  | 1,04        | 3.64  | 0,83        | 3.63  | 0,82        |
| H18  | 7.08         | 8.72  | 1,64        | 7.71  | 0,63        | 7.77  | 0,69        |
| H21  | 7.49         | 9.01  | 1,52        | 8.37  | 0,88        | 8.54  | 1,05        |
| H23  | 7.08         | 7.87  | 0,79        | 7.24  | 0,16        | 7.30  | 0,22        |
| H24  | 6.82         | 7.94  | 1,12        | 6.96  | 0,14        | 7.09  | 0,27        |
| H27  | 7.08         | 8.17  | 1,09        | 7.43  | 0,35        | 7.61  | 0,53        |
| H29A | 6.01         | 5.89  | 0,12        | 6.07  | 0,06        | 5.92  | 0,09        |
| H29B | 6.01         | 6.40  | 0,39        | 6.43  | 0,42        | 6.30  | 0,29        |
|      | □            |       | <b>0.90</b> |       | <b>0.39</b> |       | <b>0.44</b> |

**Table SI-4.** Calculated and experimental <sup>13</sup>C chemical shift (ppm) values of compound 6.

| Atom | M062X        |        |             | TPSS   |            | B3LYP  |            |
|------|--------------|--------|-------------|--------|------------|--------|------------|
|      | Experimental | Cal    | Δx          | Cal    | Δx         | Cal    | Δx         |
| C1   | 150.16       | 169.49 | 19,33       | 150.01 | 0,15       | 157.21 | 7,05       |
| C2   | 114.20       | 132.98 | 18,78       | 117.10 | 2,9        | 121.84 | 7,64       |
| C3   | 143.36       | 165.46 | 22,1        | 144.59 | 1,23       | 151.96 | 8,6        |
| C6   | 12.43        | 14.42  | 1,99        | 16.53  | 4,1        | 15.68  | 3,25       |
| C7   | 139.28       | 161.53 | 22,25       | 142.04 | 2,76       | 148.71 | 9,43       |
| C9   | 158.01       | 187.86 | 29,85       | 161.26 | 3,25       | 169.72 | 11,71      |
| C10  | 128.72       | 150.34 | 21,62       | 128.74 | 0,02       | 134.82 | 6,1        |
| C11  | 129.87       | 154.35 | 24,48       | 129.50 | 0,37       | 137.27 | 7,4        |
| C12  | 120.60       | 138.52 | 17,92       | 118.08 | 2,52       | 123.86 | 3,26       |
| C13  | 128.91       | 151.27 | 22,36       | 129.32 | 0,41       | 135.86 | 6,95       |
| C14  | 125.57       | 146.14 | 20,57       | 124.57 | 1          | 130.66 | 5,09       |
| C15  | 128.91       | 152.17 | 23,26       | 129.10 | 0,19       | 135.68 | 6,77       |
| C16  | 120.60       | 139.68 | 19,08       | 118.70 | 1,9        | 124.43 | 3,83       |
| C17  | 24.75        | 33.03  | 8,28        | 30.67  | 5,92       | 30.56  | 5,81       |
| C18  | 125.34       | 141.67 | 16,33       | 121.23 | 4,11       | 126.87 | 1,53       |
| C19  | 193.85       | 215.47 | 21,62       | 187.62 | 6,23       | 196.17 | 2,32       |
| C21  | 145.77       | 173.37 | 27,6        | 147.45 | 1,68       | 156.97 | 11,2       |
| C22  | 128.76       | 149.63 | 20,87       | 130.05 | 1,29       | 136.25 | 7,49       |
| C23  | 123.97       | 150.86 | 26,89       | 130.30 | 6,33       | 136.93 | 12,96      |
| C24  | 108.59       | 128.68 | 20,09       | 108.80 | 0,21       | 114.22 | 5,63       |
| C25  | 148.41       | 171.00 | 22,59       | 153.11 | 4,7        | 159.17 | 10,76      |
| C26  | 150.12       | 167.63 | 17,51       | 150.00 | 0,12       | 155.96 | 5,84       |
| C27  | 106.53       | 123.09 | 16,56       | 103.55 | 2,98       | 109.43 | 2,9        |
| C29  | 101.64       | 106.23 | 4,59        | 105.60 | 3,96       | 106.56 | 4,92       |
|      | □            |        | <b>19.4</b> |        | <b>2.4</b> |        | <b>6.6</b> |

**Table SI-5.** Cartesian coordinates of monomer optimized at M062X/6-311++g(d,p) level of theory.

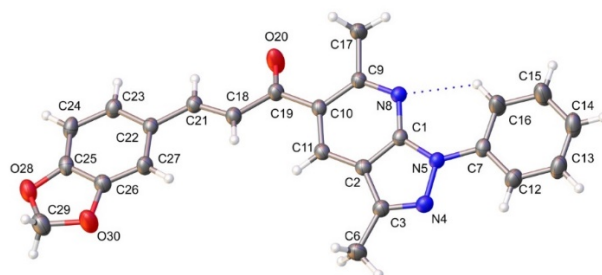

|   |             |             |             |
|---|-------------|-------------|-------------|
| O | 0.00000000  | 0.00000000  | 0.00000000  |
| O | 0.00000000  | 0.00000000  | 8.34986301  |
| O | 2.06653019  | 0.00000000  | 7.36614910  |
| N | 6.38985803  | -1.85481766 | -1.62879983 |
| N | 5.66305604  | -1.05325576 | -2.46217512 |
| N | 3.50736665  | 0.06652822  | -2.36528812 |
| C | 4.47912063  | -0.70135449 | -1.86858728 |
| C | 4.47078378  | -1.31215603 | -0.60218529 |
| C | 5.71039431  | -2.02342542 | -0.52528450 |
| C | 6.23038506  | -2.85368994 | 0.59942205  |
| H | 7.20261415  | -3.26459676 | 0.33078559  |
| H | 5.54821327  | -3.67793263 | 0.82046230  |
| H | 6.33942091  | -2.25493832 | 1.50678316  |
| C | 6.19173136  | -0.72744084 | -3.74046521 |
| C | 2.44002463  | 0.24804516  | -1.59770327 |
| C | 2.32689100  | -0.31763064 | -0.28764753 |
| C | 3.36149826  | -1.09793309 | 0.20778576  |
| H | 3.29411316  | -1.55413675 | 1.18992709  |
| C | 7.42028692  | -1.27449972 | -4.11692552 |
| H | 7.93961213  | -1.93009079 | -3.43326964 |
| C | 7.95459908  | -0.96803624 | -5.36048833 |
| H | 8.90783986  | -1.39756166 | -5.64529851 |
| C | 7.27968481  | -0.12276476 | -6.23547617 |
| H | 7.70103525  | 0.11205384  | -7.20534697 |
| C | 6.05840085  | 0.41581721  | -5.85007136 |
| H | 5.52027663  | 1.07542980  | -6.52048041 |
| C | 5.50513507  | 0.12285112  | -4.60821286 |
| H | 4.55583135  | 0.54387465  | -4.31463495 |
| C | 1.35975975  | 1.11045870  | -2.18897156 |
| H | 1.76484686  | 1.62266918  | -3.05953214 |
| H | 0.98195028  | 1.83459423  | -1.46656472 |
| H | 0.50769923  | 0.49667795  | -2.48569252 |
| C | 1.23672889  | -0.12213508 | 2.00793448  |
| H | 2.23592068  | -0.07389695 | 2.42330354  |
| C | 1.08584231  | -0.13379294 | 0.52747915  |
| C | 0.14559248  | -0.12630484 | 2.78528560  |
| H | -0.81407944 | -0.15860573 | 2.27356697  |
| C | 0.09483242  | -0.08906986 | 4.24593523  |
| C | -1.15808550 | -0.09259224 | 4.86383858  |
| H | -2.04425444 | -0.12332909 | 4.24070526  |
| C | -1.30773807 | -0.05394209 | 6.25568146  |
| H | -2.28045651 | -0.06241302 | 6.72872896  |
| C | -0.15135851 | -0.00720855 | 6.99548409  |
| C | 1.10658664  | -0.00509443 | 6.39292586  |
| C | 1.26703601  | -0.04674226 | 5.03498831  |
| H | 2.25680399  | -0.04958665 | 4.59827253  |
| C | 1.37205941  | 0.31851579  | 8.56615951  |
| H | 1.46341879  | 1.39223077  | 8.76397420  |
| H | 1.76025277  | -0.28489627 | 9.38298806  |

**Table SI-6.** Experimental and theoretical bond lengths (Å).

| <b>Distance</b> | <b>M062X</b> | <b>TPSS</b> | <b>B3LYP</b> | <b>Experimental</b> |
|-----------------|--------------|-------------|--------------|---------------------|
| D (O20-C19)     | 1.215        | 1.238       | 1.225        | 1.231               |
| D (O28-C25)     | 1.363        | 1.375       | 1.368        | 1.371               |
| D (O28-C29)     | 1.425        | 1.447       | 1.436        | 1.434               |
| D (O30-C26)     | 1.367        | 1.382       | 1.374        | 1.386               |
| D (O30-C29)     | 1.423        | 1.441       | 1.432        | 1.430               |
| D (N4-N5)       | 1.366        | 1.385       | 1.376        | 1.393               |
| D (N4-C3)       | 1.307        | 1.326       | 1.314        | 1.323               |
| D (N5-C1)       | 1.370        | 1.382       | 1.376        | 1.378               |
| D (N5-C7)       | 1.421        | 1.427       | 1.423        | 1.426               |
| D (N8-C1)       | 1.334        | 1.342       | 1.335        | 1.348               |
| D (N8-C9)       | 1.327        | 1.343       | 1.334        | 1.342               |
| D (C1-C2)       | 1.406        | 1.418       | 1.412        | 1.408               |
| D (C2-C3)       | 1.431        | 1.433       | 1.432        | 1.434               |
| D (C2-C11)      | 1.390        | 1.397       | 1.392        | 1.397               |
| D (C3-C6)       | 1.492        | 1.498       | 1.494        | 1.500               |
| D (C7-C12)      | 1.397        | 1.405       | 1.400        | 1.387               |
| D (C7-C17)      | 1.395        | 1.405       | 1.400        | 1.377               |
| D (C9-C10)      | 1.431        | 1.440       | 1.435        | 1.440               |
| D (C9-C17)      | 1.503        | 1.509       | 1.506        | 1.512               |
| D (C10-C11)     | 1.387        | 1.401       | 1.394        | 1.392               |
| D (C10-C19)     | 1.496        | 1.500       | 1.499        | 1.504               |
| D (C12-C13)     | 1.388        | 1.395       | 1.391        | 1.387               |
| D (C13-C14)     | 1.391        | 1.400       | 1.394        | 1.370               |
| D (C14-C15)     | 1.389        | 1.398       | 1.392        | 1.374               |
| D (C15-C16)     | 1.391        | 1.398       | 1.393        | 1.394               |
| D (C18-C19)     | 1.488        | 1.482       | 1.484        | 1.482               |
| D (C18-C21)     | 1.340        | 1.357       | 1.348        | 1.339               |
| D (C21-C22)     | 1.462        | 1.455       | 1.457        | 1.464               |
| D (C22-C23)     | 1.397        | 1.412       | 1.405        | 1.396               |
| D (C22-C27)     | 1.414        | 1.424       | 1.419        | 1.416               |
| D (C23-C24)     | 1.400        | 1.404       | 1.401        | 1.399               |
| D (C24-C25)     | 1.374        | 1.385       | 1.378        | 1.365               |
| D (C25-C26)     | 1.395        | 1.401       | 1.396        | 1.390               |
| D (C26-C27)     | 1.368        | 1.376       | 1.371        | 1.365               |



Table SI-7. Experimental and theoretical bond angles (°).

| Bond angle        | M062X | TPSS  | B3LYP | Experimental |
|-------------------|-------|-------|-------|--------------|
| A(O20-C19- C10)   | 121.2 | 120.9 | 121.0 | 121.3        |
| A(O20- C19- C18)  | 121.5 | 121.6 | 121.6 | 119.6        |
| A(C25-O28- C29)   | 105.0 | 104.9 | 105.5 | 105.7        |
| A(O28- C25- C24)  | 129.0 | 128.3 | 128.7 | 128.5        |
| A(O28- C25- C26)  | 109.2 | 109.8 | 109.6 | 110.4        |
| A(O28- C29- O30)  | 107.0 | 107.4 | 107.2 | 108.3        |
| A(C26-O30- C29)   | 105.0 | 104.9 | 105.5 | 105.9        |
| A(O30- C26- C25)  | 109.0 | 109.5 | 109.3 | 109.1        |
| A(O30- C26- C27)  | 128.6 | 128.1 | 128.4 | 127.9        |
| A(N5- N4-C3)      | 108.3 | 107.7 | 108.2 | 107.5        |
| A(N4- N5-C1)      | 110.3 | 110.2 | 110.0 | 110.0        |
| A(N4- N5-C7)      | 119.0 | 118.8 | 119.0 | 118.4        |
| A(N4- C3-C2)      | 109.9 | 110.2 | 110.0 | 110.3        |
| A(N4- C3-C6)      | 121.8 | 120.7 | 121.3 | 121.2        |
| A(C1- N5- C7)     | 130.7 | 131.0 | 130.9 | 131.6        |
| A(N5- C1-N8)      | 128.0 | 127.6 | 128.1 | 127.3        |
| A(N5- C1- C2)     | 106.5 | 106.5 | 106.6 | 106.9        |
| A(N5- C7-C12)     | 118.7 | 118.8 | 119.0 | 119.2        |
| A(N5- C7-C16)     | 121.1 | 120.9 | 121.1 | 121.3        |
| A(C1- N8-C9)      | 116.7 | 116.5 | 117.1 | 116.0        |
| A(N8- C1- C2)     | 125.5 | 125.9 | 125.3 | 125.8        |
| A(N8- C9- C10)    | 122.6 | 122.6 | 122.4 | 123.2        |
| A(C1- C2- C3)     | 105.0 | 105.3 | 105.2 | 105.4        |
| A(C1- C2-C11)     | 117.6 | 117.1 | 117.4 | 117.3        |
| A(C3- C2- C11)    | 137.4 | 137.6 | 137.4 | 137.2        |
| A(C2- C3- C6)     | 128.3 | 129.1 | 128.7 | 128.6        |
| A(C2- C11- C10)   | 118.3 | 118.7 | 118.8 | 119.1        |
| A(C12- C7- C16)   | 120.3 | 120.3 | 120.0 | 119.5        |
| A(C7- C12-C13)    | 119.6 | 119.5 | 119.7 | 120.2        |
| A(C7- C16-C15)    | 119.2 | 119.2 | 119.4 | 119.5        |
| A(C10- C9-C17)    | 122.0 | 122.5 | 122.4 | 122.7        |
| A(C9- C10- C11)   | 119.4 | 119.1 | 119.0 | 118.6        |
| A(C9- C10- C19)   | 121.0 | 121.3 | 121.4 | 121.6        |
| A(C11- C10- C19)  | 119.5 | 119.5 | 119.6 | 119.7        |
| A(C10- C19- C18)  | 117.3 | 117.6 | 117.5 | 119.0        |
| A(C12- C13-C14)   | 120.7 | 120.8 | 120.8 | 120.4        |
| A(C13- C14- C15)  | 119.2 | 119.2 | 119.1 | 119.4        |
| A(C14- C15- C16)  | 121.0 | 121.0 | 121.0 | 121.0        |
| A(C19- C18-C21)   | 119.6 | 120.2 | 120.5 | 121.9        |
| A(C18- C21- C22)  | 127.4 | 128.0 | 128.1 | 127.9        |
| A(C21-C22-C23)    | 118.2 | 118.1 | 118.2 | 118.6        |
| A(C21- C22- C27)  | 122.0 | 122.5 | 122.5 | 122.1        |
| A(C23- C22- C27)  | 119.8 | 119.4 | 119.3 | 119.3        |
| A(C22- C23- C24)  | 122.4 | 122.6 | 122.5 | 122.5        |
| A(C22-C27- C26)   | 117.2 | 117.3 | 117.5 | 117.1        |
| A(C23- C24- C25)  | 116.5 | 116.5 | 116.7 | 117.1        |
| A(C24 - C25- C26) | 121.8 | 121.8 | 121.7 | 121.1        |
| A(C25- C26- C27)  | 122.3 | 122.4 | 122.3 | 123.0        |

Table SI-8. Experimental dihedral Angles (°).

| A   | B   | C   | D   | Angle       | A   | B   | C   | D   | Angle      |
|-----|-----|-----|-----|-------------|-----|-----|-----|-----|------------|
| O28 | C25 | C26 | O30 | -0.4(3)     | C9  | C10 | C19 | C18 | -163.4(2)  |
| O28 | C25 | C26 | C27 | 178.9(2)    | C11 | C2  | C3  | N4  | 177.1(2)   |
| O30 | C26 | C27 | C22 | -179.7(2)   | C11 | C2  | C3  | C6  | -2.9(4)    |
| N4  | N5  | C1  | N8  | 179.99(19)  | C11 | C10 | C19 | O20 | -156.4(2)  |
| N4  | N5  | C1  | C2  | 0.7(2)      | C11 | C10 | C19 | C18 | 20.7(3)    |
| N4  | N5  | C7  | C12 | -1.5(3)     | C12 | C7  | C16 | C15 | 0.2(4)     |
| N4  | N5  | C7  | C16 | 179.0(2)    | C12 | C13 | C14 | C15 | -0.2(5)    |
| N5  | N4  | C3  | C2  | -0.3(2)     | C13 | C14 | C15 | C16 | -0.2(5)    |
| N5  | N4  | C3  | C6  | 179.8(2)    | C14 | C15 | C16 | C7  | 0.2(5)     |
| N5  | C1  | C2  | C3  | -0.8(2)     | C16 | C7  | C12 | C13 | -0.6(4)    |
| N5  | C1  | C2  | C11 | -178.11(17) | C17 | C9  | C10 | C11 | -176.9(2)  |
| N5  | C7  | C12 | C13 | 179.8(2)    | C17 | C9  | C10 | C19 | 7.1(3)     |
| N5  | C7  | C16 | C15 | 179.8(3)    | C18 | C21 | C22 | C23 | -179.8(2)  |
| N8  | C1  | C2  | C3  | 179.9(2)    | C18 | C21 | C22 | C27 | -1.6(4)    |
| N8  | C1  | C2  | C11 | 2.6(3)      | C19 | C10 | C11 | C2  | 175.00(19) |
| N8  | C9  | C10 | C11 | 1.1(3)      | C19 | C18 | C21 | C22 | 176.1(2)   |
| N8  | C9  | C10 | C19 | -174.81(19) | C21 | C18 | C19 | O20 | -0.9(4)    |
| C1  | N5  | C7  | C12 | -178.0(2)   | C21 | C18 | C19 | C10 | -178.0(2)  |
| C1  | N5  | C7  | C16 | 2.4(4)      | C21 | C22 | C23 | C24 | 178.5(2)   |
| C1  | N8  | C9  | C10 | 0.6(3)      | C21 | C22 | C27 | C26 | -178.9(2)  |
| C1  | N8  | C9  | C17 | 178.8(2)    | C22 | C23 | C24 | C25 | -0.1(3)    |
| C1  | C2  | C3  | N4  | 0.7(2)      | C23 | C22 | C27 | C26 | -0.7(3)    |
| C1  | C2  | C3  | C6  | -179.4(2)   | C23 | C24 | C25 | O28 | -179.5(2)  |
| C1  | C2  | C11 | C10 | -0.6(3)     | C23 | C24 | C25 | C26 | 0.4(4)     |
| C3  | N4  | N5  | C1  | -0.3(2)     | C24 | C25 | C26 | O30 | 179.7(2)   |
| C3  | N4  | N5  | C7  | -177.54(19) | C24 | C25 | C26 | C27 | -1.0(4)    |
| C3  | C2  | C11 | C10 | -176.8(2)   | C25 | O28 | C29 | O30 | -7.2(3)    |
| C7  | N5  | C1  | N8  | -3.2(4)     | C25 | C26 | C27 | C22 | 1.1(4)     |
| C7  | N5  | C1  | C2  | 177.5(2)    | C26 | O30 | C29 | O28 | 7.0(3)     |
| C7  | C12 | C13 | C14 | 0.6(4)      | C27 | C22 | C23 | C24 | 0.3(3)     |
| C9  | N8  | C1  | N5  | 178.3(2)    | C29 | O28 | C25 | C24 | -175.4(3)  |
| C9  | N8  | C1  | C2  | -2.5(3)     | C29 | O28 | C25 | C26 | 4.7(3)     |
| C9  | C10 | C11 | C2  | -1.0(3)     | C29 | O30 | C26 | C25 | -4.1(3)    |
| C9  | C10 | C19 | O20 | 19.4(3)     | C29 | O30 | C26 | C27 | 176.6(3)   |

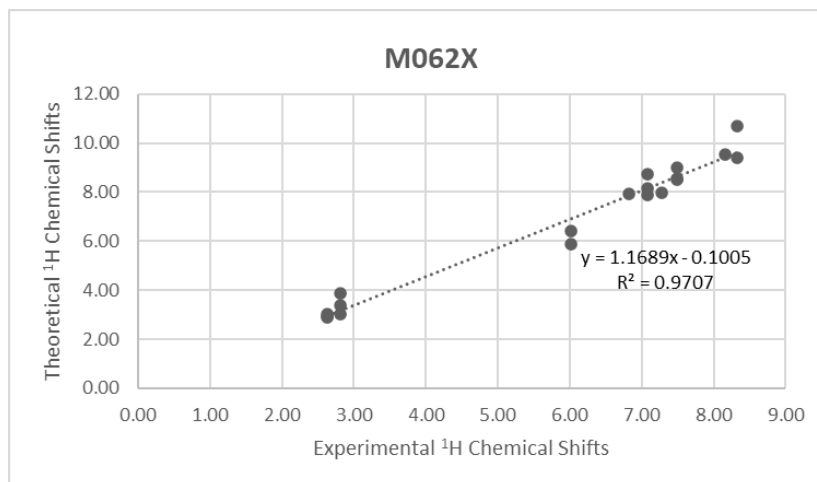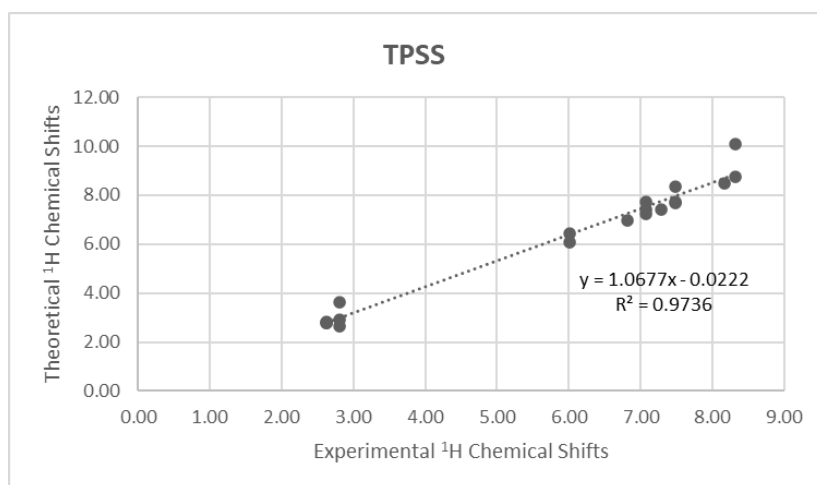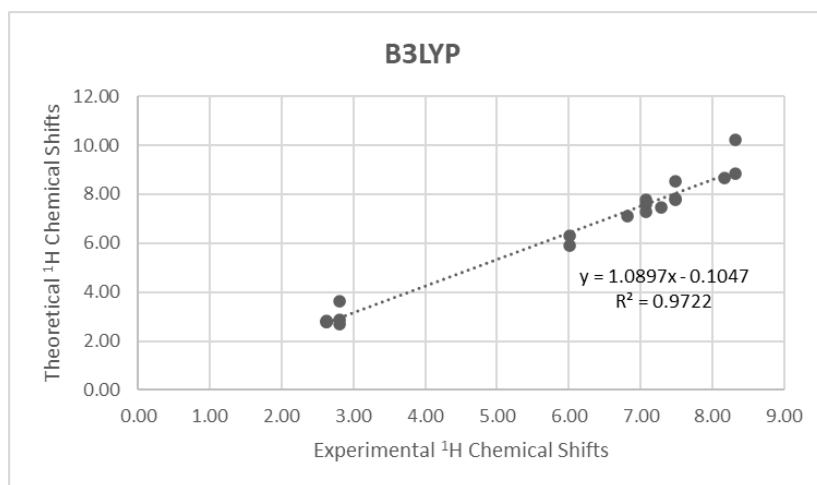

Figure SI-5. Correlation graphs between experimental and theoretical <sup>1</sup>H NMR chemical shift values of the title compound.

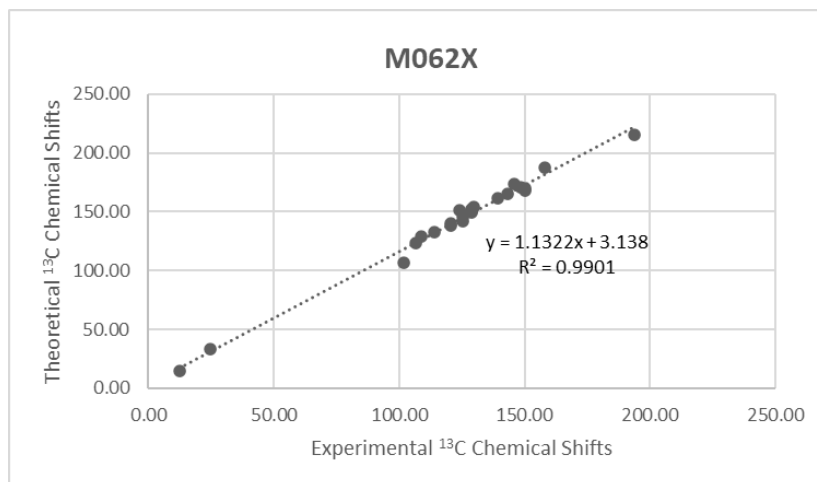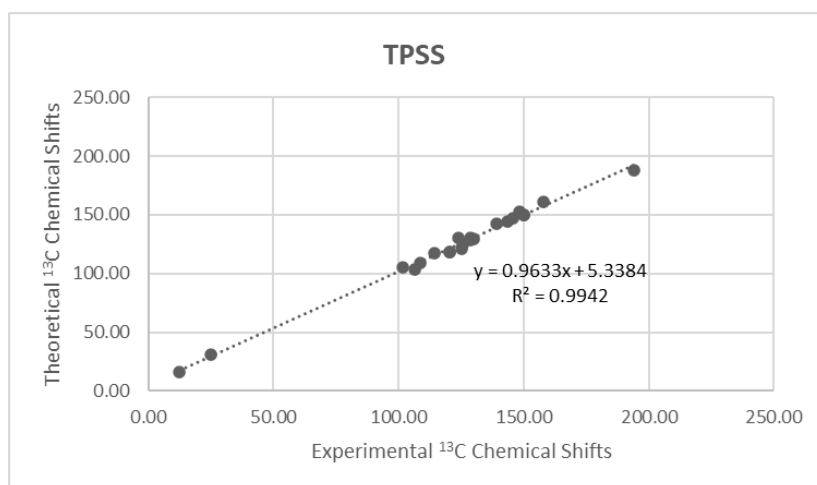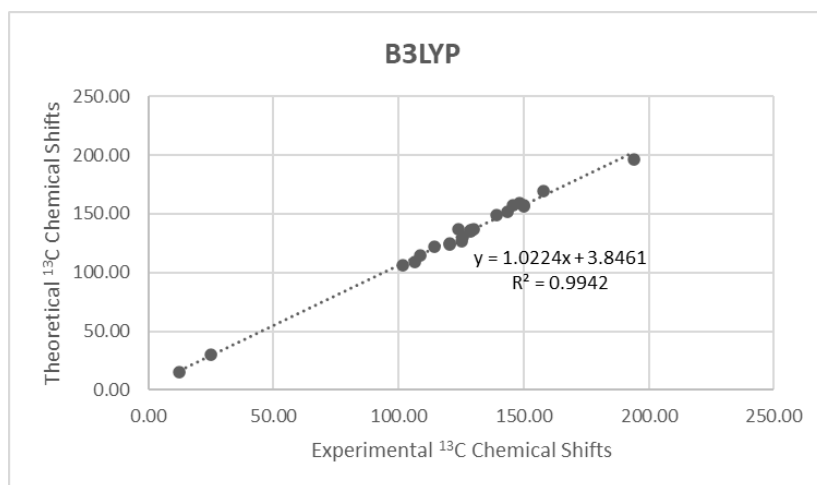

**Figure SI-6.** Correlation graphs between experimental and theoretical <sup>13</sup>C NMR chemical shift values of the title compound.

**Table SI-9.** Dipole moment, polarizability, and hyperpolarizability values obtained at CAM-B3LYP/6-311++g(d,p) level of theory.

| Title compound                                              |                 |                 |                 |                 |                 |                        |                 |                 |                 |                       |                 |                 |                 |                 |                        |
|-------------------------------------------------------------|-----------------|-----------------|-----------------|-----------------|-----------------|------------------------|-----------------|-----------------|-----------------|-----------------------|-----------------|-----------------|-----------------|-----------------|------------------------|
| Dipole moment (Debye)                                       |                 |                 |                 |                 |                 |                        |                 |                 |                 |                       |                 |                 |                 |                 |                        |
| $\mu_x$                                                     | $\mu_y$         | $\mu_z$         | $\mu$           |                 |                 |                        |                 |                 |                 |                       |                 |                 |                 |                 |                        |
| -4,237100                                                   | -2,530250       | 0,845993        | 5,007           |                 |                 |                        |                 |                 |                 |                       |                 |                 |                 |                 |                        |
| polarizability (10 <sup>-24</sup> esu)                      |                 |                 |                 |                 |                 |                        |                 |                 |                 |                       |                 |                 |                 |                 |                        |
| $\alpha_{xx}$                                               | $\alpha_{xy}$   | $\alpha_{yy}$   | $\alpha_{xz}$   | $\alpha_{yz}$   | $\alpha_{zz}$   | $\langle\alpha\rangle$ |                 |                 |                 |                       |                 |                 |                 |                 |                        |
| 79,269500                                                   | 0,103276        | 46,703700       | 2,275300        | 0,294936        | 26,510400       | 50,827867              |                 |                 |                 |                       |                 |                 |                 |                 |                        |
| hyperpolarizability (10 <sup>-30</sup> esu)                 |                 |                 |                 |                 |                 |                        |                 |                 |                 |                       |                 |                 |                 |                 |                        |
| $\beta_{xxx}$                                               | $\beta_{xxy}$   | $\beta_{xyx}$   | $\beta_{yyy}$   | $\beta_{xxz}$   | $\beta_{yxz}$   | $\beta_{yyz}$          | $\beta_{zxx}$   | $\beta_{zyz}$   | $\beta_{zzz}$   | $\langle\beta\rangle$ |                 |                 |                 |                 |                        |
| 19,689400                                                   | 17,495600       | 0,102002        | 0,453853        | -2,402840       | -0,282915       | -0,798313              | 0,804725        | 0,212376        | 0,599606        | 27,4642393            |                 |                 |                 |                 |                        |
| Second dipole hyperpolarizability (10 <sup>-36</sup> esu)   |                 |                 |                 |                 |                 |                        |                 |                 |                 |                       |                 |                 |                 |                 |                        |
| $\gamma_{xxxx}$                                             | $\gamma_{xxyx}$ | $\gamma_{xyxy}$ | $\gamma_{yyyy}$ | $\gamma_{yyyy}$ | $\gamma_{xxzx}$ | $\gamma_{xxyy}$        | $\gamma_{xyzy}$ | $\gamma_{yyzy}$ | $\gamma_{xxzz}$ | $\gamma_{yxzz}$       | $\gamma_{yyzz}$ | $\gamma_{zxxx}$ | $\gamma_{zyzz}$ | $\gamma_{zzzz}$ | $\langle\gamma\rangle$ |
| 502,871000                                                  | 17,556800       | 43,325000       | -3,849380       | 29,559200       | -6,054570       | -6,105900              | -0,925067       | 0,532152        | 15,850000       | 0,393220              | 7,578540        | 0,570437        | 0,351177        | 21,059000       | 137,39926              |
| UREA                                                        |                 |                 |                 |                 |                 |                        |                 |                 |                 |                       |                 |                 |                 |                 |                        |
| Dipole moment (Debye)                                       |                 |                 |                 |                 |                 |                        |                 |                 |                 |                       |                 |                 |                 |                 |                        |
| $\mu_x$                                                     | $\mu_y$         | $\mu_z$         | $\mu$           |                 |                 |                        |                 |                 |                 |                       |                 |                 |                 |                 |                        |
| 0,000184                                                    | -3,875030       | 0,000000        | 3,875           |                 |                 |                        |                 |                 |                 |                       |                 |                 |                 |                 |                        |
| polarizability (10 <sup>-24</sup> esu)                      |                 |                 |                 |                 |                 |                        |                 |                 |                 |                       |                 |                 |                 |                 |                        |
| $\alpha_{xx}$                                               | $\alpha_{xy}$   | $\alpha_{yy}$   | $\alpha_{xz}$   | $\alpha_{yz}$   | $\alpha_{zz}$   | $\langle\alpha\rangle$ |                 |                 |                 |                       |                 |                 |                 |                 |                        |
| 5,250520                                                    | -0,000141       | 5,695470        | 0,044968        | 0,000099        | 3,548960        | 4,83165                |                 |                 |                 |                       |                 |                 |                 |                 |                        |
| hyperpolarizability (10 <sup>-30</sup> esu)                 |                 |                 |                 |                 |                 |                        |                 |                 |                 |                       |                 |                 |                 |                 |                        |
| $\beta_{xxx}$                                               | $\beta_{xxy}$   | $\beta_{xyx}$   | $\beta_{yyy}$   | $\beta_{xxz}$   | $\beta_{yxz}$   | $\beta_{yyz}$          | $\beta_{zxx}$   | $\beta_{zyz}$   | $\beta_{zzz}$   | $\langle\beta\rangle$ |                 |                 |                 |                 |                        |
| -0,000030                                                   | 0,432433        | 0,000151        | -0,572009       | 0,000032        | 0,024244        | -0,000054              | 0,000037        | -0,273526       | 0,000063        | 0,41381331            |                 |                 |                 |                 |                        |
| Second dipole hyperpolarizability ((10 <sup>-36</sup> esu)) |                 |                 |                 |                 |                 |                        |                 |                 |                 |                       |                 |                 |                 |                 |                        |
| $\gamma_{xxxx}$                                             | $\gamma_{xxyx}$ | $\gamma_{xyxy}$ | $\gamma_{yyyy}$ | $\gamma_{yyyy}$ | $\gamma_{xxzx}$ | $\gamma_{xxyy}$        | $\gamma_{xyzy}$ | $\gamma_{yyzy}$ | $\gamma_{xxzz}$ | $\gamma_{yxzz}$       | $\gamma_{yyzz}$ | $\gamma_{zxxx}$ | $\gamma_{zyzz}$ | $\gamma_{zzzz}$ | $\langle\gamma\rangle$ |
| 4,361840                                                    | -0,000168       | 1,401950        | -0,000194       | 2,108040        | 0,060824        | 0,000063               | -0,076203       | 0,000197        | 0,760435        | -0,000020             | 0,778058        | -0,104961       | 0,000000        | 2,356410        | 2,9414352              |
